# Supplementary material for: Comprehensive Effects of Potassium Lactate, Calcium Ascorbate and Magnesium Chloride as Alternative Salts on Physicochemical Properties, Sensory Characteristics and Volatile Compounds in Low-Sodium Marinated Beef
Source: MDPI journal article supplement (doi:10.3390/foods13020291), 2024-01-17
Supplement: s1 [file s1]

**Supplementary Table S1** Qualitative analysis information of volatile flavor substances in marinated beef. Values represent the mean  $\pm$  S.E. (n = 3). The upper lowercase letters indicate significantly different in the same column ( $P < 0.05$ ). MW: molecular weight; RI: retention index; RT: retention time; DT: drift time; volume (a.u.): peak volume.

| No.     | Compound                | CAS#     | Formula                                      | MW    | RI     | Rt(s)   | Dt(a.u.) | volume (a.u.)                |                             |                              |                              |
|---------|-------------------------|----------|----------------------------------------------|-------|--------|---------|----------|------------------------------|-----------------------------|------------------------------|------------------------------|
|         |                         |          |                                              |       |        |         |          | C1                           | C2                          | F1                           | F2                           |
| Ketones |                         |          |                                              |       |        |         |          |                              |                             |                              |                              |
| 1       | 2-Propanone             | C67641   | C <sub>3</sub> H <sub>6</sub> O              | 58.1  | 513.0  | 113.467 | 1.12392  | 4351.12±215.50 <sup>b</sup>  | 3385.46±118.98 <sup>a</sup> | 6054.56±437.92 <sup>c</sup>  | 7552.66±291.32 <sup>d</sup>  |
| 2       | 2-Butanone-M            | C78933   | C <sub>4</sub> H <sub>8</sub> O              | 72.1  | 575.3  | 140.698 | 1.06685  | 2482.01±129.67 <sup>a</sup>  | 2396.42±154.02 <sup>a</sup> | 2727.76±331.46 <sup>a</sup>  | 2691.47±71.65 <sup>a</sup>   |
| 3       | 2-Butanone-D            | C78933   | C <sub>4</sub> H <sub>8</sub> O              | 72.1  | 577.7  | 141.726 | 1.25239  | 2296.98±135.00 <sup>a</sup>  | 1390.78±3.80 <sup>a</sup>   | 4080.28±908.40 <sup>b</sup>  | 6063.9±795.73 <sup>c</sup>   |
| 4       | 3-Hydroxy-2-butanone-   | C513860  | C <sub>4</sub> H <sub>8</sub> O <sub>2</sub> | 88.1  | 705.0  | 203.633 | 1.05839  | 4228.5±265.12 <sup>a</sup>   | 4230.24±44.43 <sup>a</sup>  | 3816.85±266.36 <sup>ab</sup> | 3663.44±411.55 <sup>a</sup>  |
| 5       | 3-Hydroxy-2-butanone-D  | C513860  | C <sub>4</sub> H <sub>8</sub> O <sub>2</sub> | 88.1  | 709.4  | 207.230 | 1.33182  | 7132.57±508.94 <sup>ab</sup> | 6472.24±161.23 <sup>a</sup> | 7574.95±109.87 <sup>ab</sup> | 7851.79±1002.29 <sup>b</sup> |
| 6       | 2-Heptanone             | C110430  | C <sub>7</sub> H <sub>14</sub> O             | 114.2 | 892.9  | 393.972 | 1.26498  | 127.76±22.32 <sup>a</sup>    | 184.79±3.06 <sup>b</sup>    | 126.34±19.38 <sup>a</sup>    | 135.07±4.29 <sup>a</sup>     |
| 7       | Cyclohexanone           | C108941  | C <sub>6</sub> H <sub>10</sub> O             | 98.1  | 896.9  | 401.310 | 1.15173  | 159.91±20.01 <sup>a</sup>    | 334.57±13.61 <sup>b</sup>   | 159.84±19.83 <sup>a</sup>    | 163.18±5.61 <sup>a</sup>     |
| 8       | 6-Methyl-5-hepten-2-one | C110930  | C <sub>8</sub> H <sub>14</sub> O             | 126.2 | 991.4  | 577.665 | 1.18050  | 177.07±33.51 <sup>a</sup>    | 159.39±7.79 <sup>a</sup>    | 164.44±17.12 <sup>a</sup>    | 151.38±13.51 <sup>a</sup>    |
| 9       | Acetophenone            | C98862   | C <sub>8</sub> H <sub>8</sub> O              | 120.2 | 1065.2 | 714.661 | 1.18378  | 122.72±21.42 <sup>b</sup>    | 94.41±4.59 <sup>a</sup>     | 80.9±2.42 <sup>a</sup>       | 84.35±6.15 <sup>a</sup>      |
| 10      | 3-Methylbutanal-M       | C590863  | C <sub>5</sub> H <sub>10</sub> O             | 86.1  | 641.0  | 169.373 | 1.17608  | 1113.96±79.25 <sup>a</sup>   | 1140.58±151.97 <sup>a</sup> | 1809.38±154.23 <sup>b</sup>  | 1896.01±124.35 <sup>b</sup>  |
| 11      | 3-Methylbutanal-D       | C590863  | C <sub>5</sub> H <sub>10</sub> O             | 86.1  | 643.2  | 170.346 | 1.40841  | 225.72±14.16 <sup>a</sup>    | 231.29±45.84 <sup>a</sup>   | 1071.7±529.37 <sup>b</sup>   | 1933.54±342.21 <sup>c</sup>  |
| 12      | Pentanal-M              | C110623  | C <sub>5</sub> H <sub>10</sub> O             | 86.1  | 691.6  | 192.558 | 1.18273  | 527.52±36.02 <sup>b</sup>    | 1049.06±37.32 <sup>c</sup>  | 488.66±50.21 <sup>ab</sup>   | 426.73±36.07 <sup>a</sup>    |
| 13      | Pentanal-D              | C110623  | C <sub>5</sub> H <sub>10</sub> O             | 86.1  | 691.2  | 192.331 | 1.42426  | 56.01±14.73 <sup>a</sup>     | 464.14±57.18 <sup>b</sup>   | 65.77±19.03 <sup>a</sup>     | 61.92±14.24 <sup>a</sup>     |
| 14      | 2-Pentenal-(E)          | C1576870 | C <sub>5</sub> H <sub>8</sub> O              | 84.1  | 745.1  | 236.461 | 1.10614  | 42.71±6.68 <sup>a</sup>      | 152.65±15.58 <sup>c</sup>   | 66.09±13.22 <sup>b</sup>     | 79.09±12.12 <sup>b</sup>     |
| 15      | Hexana-M                | C66251   | C <sub>6</sub> H <sub>12</sub> O             | 100.2 | 791.0  | 276.330 | 1.25434  | 1013.34±18.93 <sup>a</sup>   | 1028.37±74.46 <sup>a</sup>  | 978.56±51.86 <sup>a</sup>    | 1006.77±82.32 <sup>a</sup>   |

Supplementary Table S1 (Continued)

| No.              | Compound              | CAS#      | Formula                          | MW    | RI     | Rt(s)   | Dt(a.u.) | Volumn(a.u.)                   |                               |                               |                                |
|------------------|-----------------------|-----------|----------------------------------|-------|--------|---------|----------|--------------------------------|-------------------------------|-------------------------------|--------------------------------|
|                  |                       |           |                                  |       |        |         |          | C1                             | C2                            | F1                            | F2                             |
| 16               | Hexanal-D             | C66251    | C <sub>6</sub> H <sub>12</sub> O | 100.2 | 791.2  | 276.586 | 1.56423  | 1702.81 ± 349.83 <sup>a</sup>  | 3769.32 ± 139.04 <sup>b</sup> | 1525.43 ± 267.45 <sup>a</sup> | 1799.96 ± 258.03 <sup>a</sup>  |
| <b>Aldehydes</b> |                       |           |                                  |       |        |         |          |                                |                               |                               |                                |
| 17               | (E)-2-Hexenal-M       | C6728263  | C <sub>6</sub> H <sub>10</sub> O | 98.1  | 846.7  | 340.325 | 1.18086  | 200.13 ± 38.50 <sup>a</sup>    | 333.96 ± 22.04 <sup>c</sup>   | 225.39 ± 26.13 <sup>ab</sup>  | 285.12 ± 46.23 <sup>bc</sup>   |
| 18               | (E)-2-Hexenal-D       | C6728263  | C <sub>6</sub> H <sub>10</sub> O | 98.1  | 846.7  | 340.325 | 1.51962  | 33.31 ± 9.31 <sup>a</sup>      | 85.27 ± 8.33 <sup>b</sup>     | 46.86 ± 9.47 <sup>a</sup>     | 68.71 ± 14.17 <sup>b</sup>     |
| 19               | Heptana-M             | C111717   | C <sub>7</sub> H <sub>14</sub> O | 114.2 | 900.2  | 407.457 | 1.33354  | 938.6 ± 106.10 <sup>b</sup>    | 1163.07 ± 44.23 <sup>c</sup>  | 743.39 ± 30.98 <sup>a</sup>   | 698.11 ± 22.66 <sup>a</sup>    |
| 20               | Heptanal-D            | C111717   | C <sub>7</sub> H <sub>14</sub> O | 114.2 | 900.2  | 407.457 | 1.69918  | 700.01 ± 128.70 <sup>b</sup>   | 2239.8 ± 101.91 <sup>c</sup>  | 485.4 ± 53.59 <sup>a</sup>    | 437.49 ± 47.04 <sup>a</sup>    |
| 21               | Methional-M           | C3268493  | C <sub>4</sub> H <sub>8</sub> OS | 104.2 | 903.8  | 414.190 | 1.09308  | 1218.84 ± 52.05 <sup>b</sup>   | 663.13 ± 15.65 <sup>a</sup>   | 1624.23 ± 25.58 <sup>c</sup>  | 1792.84 ± 77.33 <sup>d</sup>   |
| 22               | Methional-D           | C3268493  | C <sub>4</sub> H <sub>8</sub> OS | 104.2 | 902.8  | 412.492 | 1.40093  | 1208.4 ± 233.64 <sup>b</sup>   | 616.36 ± 23.70 <sup>a</sup>   | 3076.61 ± 75.52 <sup>c</sup>  | 4374.35 ± 231.99 <sup>d</sup>  |
| 23               | Benzaldehyde-M        | C100527   | C <sub>7</sub> H <sub>6</sub> O  | 106.1 | 953.9  | 507.675 | 1.15072  | 1926.59 ± 157.82 <sup>b</sup>  | 1646.58 ± 15.66 <sup>a</sup>  | 1940.35 ± 29.30 <sup>b</sup>  | 2030.4 ± 113.74 <sup>b</sup>   |
| 24               | Benzaldehyde-D        | C100527   | C <sub>7</sub> H <sub>6</sub> O  | 106.1 | 955.9  | 511.590 | 1.47186  | 2957.13 ± 292.77 <sup>b</sup>  | 1912.95 ± 32.66 <sup>a</sup>  | 3820.89 ± 189.79 <sup>c</sup> | 4886.47 ± 133.40 <sup>d</sup>  |
| 25               | Octanal-M             | C124130   | C <sub>8</sub> H <sub>16</sub> O | 128.2 | 1011   | 614.158 | 1.40222  | 1705.75 ± 172.47 <sup>bc</sup> | 1861.99 ± 19.44 <sup>c</sup>  | 1453.23 ± 153.13 <sup>a</sup> | 1602.13 ± 24.01 <sup>ab</sup>  |
| 26               | Octanal-D             | C124130   | C <sub>8</sub> H <sub>16</sub> O | 128.2 | 1008.9 | 610.243 | 1.82590  | 1596.11 ± 207.20 <sup>a</sup>  | 2469.06 ± 264.26 <sup>b</sup> | 1218.38 ± 453.60 <sup>a</sup> | 1568.62 ± 129.01 <sup>a</sup>  |
| 27               | 2,4-Heptadienal-(E,E) | C4313035  | C <sub>7</sub> H <sub>10</sub> O | 110.2 | 1020.5 | 631.797 | 1.18958  | 138.97 ± 27.11 <sup>a</sup>    | 181.82 ± 22.45 <sup>b</sup>   | 141.33 ± 5.86 <sup>a</sup>    | 156.77 ± 12.81 <sup>ab</sup>   |
| 28               | Phenylacetaldehyde-M  | C122781   | C <sub>8</sub> H <sub>8</sub> O  | 120.2 | 1045.3 | 677.761 | 1.25044  | 407.67 ± 11.47 <sup>b</sup>    | 323.1 ± 13.99 <sup>a</sup>    | 854.06 ± 25.29 <sup>c</sup>   | 1040.17 ± 17.90 <sup>d</sup>   |
| 29               | Phenylacetaldehyde-D  | C122781   | C <sub>8</sub> H <sub>8</sub> O  | 120.2 | 1046.0 | 679.056 | 1.53882  | 36.79 ± 1.71 <sup>a</sup>      | 32.84 ± 2.77 <sup>a</sup>     | 112.71 ± 8.82 <sup>b</sup>    | 165.26 ± 0.44 <sup>c</sup>     |
| 30               | 2-Octenal-(E)         | C2548870  | C <sub>8</sub> H <sub>14</sub> O | 126.2 | 1062.9 | 710.365 | 1.33702  | 164.02 ± 23.62 <sup>a</sup>    | 312.98 ± 12.53 <sup>c</sup>   | 188.06 ± 15.26 <sup>a</sup>   | 241.82 ± 7.51 <sup>b</sup>     |
| 31               | n-Nonana- M           | C124196   | C <sub>9</sub> H <sub>18</sub> O | 142.2 | 1106.5 | 791.308 | 1.47388  | 2721.63 ± 323.61 <sup>ab</sup> | 2872.05 ± 107.35 <sup>b</sup> | 2416.52 ± 42.19 <sup>a</sup>  | 2653.94 ± 104.10 <sup>ab</sup> |
| 32               | n-Nonanal-D           | C124196   | C <sub>9</sub> H <sub>18</sub> O | 142.2 | 1106.5 | 791.308 | 1.94471  | 1912.17 ± 469.76 <sup>ab</sup> | 2353.09 ± 332.55 <sup>b</sup> | 1490.17 ± 141.93 <sup>a</sup> | 2061.02 ± 350.93 <sup>ab</sup> |
| 33               | (E)-2-Nonenal         | C18829566 | C <sub>9</sub> H <sub>16</sub> O | 140.2 | 1166.3 | 902.085 | 1.41436  | 162.55 ± 44.35 <sup>a</sup>    | 414.94 ± 46.42 <sup>b</sup>   | 185.23 ± 15.52 <sup>a</sup>   | 183.42 ± 12.20 <sup>a</sup>    |

Supplementary Table S1 (Continued)

| No.                 | Compound             | CAS#      | Formula                                        | MW    | RI     | Rt(s)    | Dt(a.u.) | Volumn(a.u.)                 |                              |                               |                               |
|---------------------|----------------------|-----------|------------------------------------------------|-------|--------|----------|----------|------------------------------|------------------------------|-------------------------------|-------------------------------|
|                     |                      |           |                                                |       |        |          |          | C1                           | C2                           | F1                            | F2                            |
| 34                  | Decanal              | C112312   | C <sub>10</sub> H <sub>20</sub> O              | 156.3 | 1222.4 | 1006.133 | 1.54092  | 195.45 ± 34.25 <sup>a</sup>  | 205.53 ± 11.72 <sup>a</sup>  | 174.01 ± 10.53 <sup>a</sup>   | 178.89 ± 2.86 <sup>a</sup>    |
| <b>Alcohols</b>     |                      |           |                                                |       |        |          |          |                              |                              |                               |                               |
| 35                  | 1-Pentanol-M         | C71410    | C <sub>5</sub> H <sub>12</sub> O               | 88.1  | 761.6  | 250.073  | 1.24957  | 499.79 ± 31.02 <sup>a</sup>  | 1097.92 ± 56.44 <sup>b</sup> | 460.85 ± 81.87 <sup>a</sup>   | 423.47 ± 64.31 <sup>a</sup>   |
| 36                  | 1-Pentanol-D         | C71410    | C <sub>5</sub> H <sub>12</sub> O               | 88.1  | 760.5  | 249.101  | 1.51036  | 77.96 ± 11.16 <sup>a</sup>   | 393.38 ± 40.17 <sup>b</sup>  | 68.94 ± 10.13 <sup>a</sup>    | 64.44 ± 16.15 <sup>a</sup>    |
| 37                  | 2,3-Butanediol       | C513859   | C <sub>4</sub> H <sub>10</sub> O <sub>2</sub>  | 90.1  | 777.7  | 263.199  | 1.36574  | 538.02 ± 36.54 <sup>b</sup>  | 374.05 ± 24.98 <sup>a</sup>  | 1419.66 ± 72.16 <sup>c</sup>  | 2282.75 ± 137.60 <sup>d</sup> |
| 38                  | n-Hexanol-M          | C111273   | C <sub>6</sub> H <sub>14</sub> O               | 102.2 | 871.8  | 369.192  | 1.32675  | 258.59 ± 24.13 <sup>a</sup>  | 491.93 ± 31.46 <sup>b</sup>  | 230.18 ± 2.95 <sup>a</sup>    | 253.83 ± 8.31 <sup>a</sup>    |
| 39                  | n-Hexanol-D          | C111273   | C <sub>6</sub> H <sub>14</sub> O               | 102.2 | 869.6  | 366.645  | 1.6383   | 23.9 ± 2.69 <sup>a</sup>     | 53.81 ± 7.34 <sup>b</sup>    | 21.24 ± 3.00 <sup>a</sup>     | 25.83 ± 4.74 <sup>a</sup>     |
| 40                  | Hheptanol            | C53535334 | C <sub>7</sub> H <sub>16</sub> O               | 116.2 | 976.7  | 550.349  | 1.39819  | 91.37 ± 15.86 <sup>a</sup>   | 243.9 ± 23.11 <sup>b</sup>   | 83.81 ± 11.33 <sup>a</sup>    | 77.95 ± 0.81 <sup>a</sup>     |
| 41                  | 1-Octen-3-ol         | C3391864  | C <sub>8</sub> H <sub>16</sub> O               | 128.2 | 984.3  | 564.471  | 1.16060  | 523.64 ± 53.36 <sup>b</sup>  | 768.41 ± 19.97 <sup>c</sup>  | 410.92 ± 66.88 <sup>a</sup>   | 521.42 ± 35.70 <sup>b</sup>   |
| 42                  | 3-Octanol            | C589980   | C <sub>8</sub> H <sub>18</sub> O               | 130.2 | 986.3  | 568.301  | 1.39959  | 174.24 ± 19.92 <sup>a</sup>  | 344.15 ± 12.37 <sup>b</sup>  | 181.39 ± 42.69 <sup>a</sup>   | 143.1 ± 22.24 <sup>a</sup>    |
| 43                  | 1-Octanol            | C111875   | C <sub>8</sub> H <sub>18</sub> O               | 130.2 | 1081.6 | 745.048  | 1.47061  | 294.76 ± 56.11 <sup>ab</sup> | 349.18 ± 40.63 <sup>b</sup>  | 267.46 ± 36.21 <sup>a</sup>   | 267.94 ± 9.86 <sup>a</sup>    |
| <b>Esters</b>       |                      |           |                                                |       |        |          |          |                              |                              |                               |                               |
| 44                  | Geranyl acetate      | C105873   | C <sub>12</sub> H <sub>20</sub> O <sub>2</sub> | 196.3 | 1346.5 | 1236.389 | 1.22031  | 856.25 ± 325.32 <sup>a</sup> | 669.29 ± 28.28 <sup>a</sup>  | 654.88 ± 20.04 <sup>a</sup>   | 708.44 ± 52.94 <sup>a</sup>   |
| <b>Heterocycles</b> |                      |           |                                                |       |        |          |          |                              |                              |                               |                               |
| 45                  | Methylpyrazine       | C109080   | C <sub>5</sub> H <sub>6</sub> N <sub>2</sub>   | 94.1  | 779.4  | 264.658  | 1.08954  | 1693.35 ± 83.86 <sup>a</sup> | 2005.23 ± 39.22 <sup>b</sup> | 2275.66 ± 119.53 <sup>c</sup> | 2531.98 ± 180.90 <sup>d</sup> |
| 46                  | 2,6-Dimethylpyrazine | C108509   | C <sub>6</sub> H <sub>8</sub> N <sub>2</sub>   | 108.1 | 900.1  | 407.362  | 1.53854  | 576.55 ± 14.31 <sup>b</sup>  | 461.07 ± 25.18 <sup>a</sup>  | 876.1 ± 37.99 <sup>c</sup>    | 1017.18 ± 86.01 <sup>d</sup>  |
| 47                  | 2-Acetylthiazole     | C24295032 | C <sub>5</sub> H <sub>5</sub> NOS              | 127.2 | 1023   | 636.356  | 1.13140  | 1068.84 ± 78.50 <sup>a</sup> | 1490.49 ± 18.87 <sup>b</sup> | 1342.62 ± 106.15 <sup>b</sup> | 1436.01 ± 111.66 <sup>b</sup> |
